# Supplementary material for: Photo-induced ligand substitution of Cr(CO)6 in 1-pentanol probed by time resolved X-ray absorption spectroscopy
Source: PubMed Central journal article supplement (PMC9348521; doi:10.1039/d1cp05834g), 2022-06-07
Supplement: CP-024-D1CP05834G-s001.pdf [file CP-024-D1CP05834G-s001.pdf]

**Supporting Information: Photo-induced Ligand Substitution of  
Cr(CO)<sub>6</sub> in 1-pentanol Probed by Time Resolved X-Ray  
Absorption Spectroscopy**

Eric John Mascarenhas,<sup>1,2</sup> Mattis Fondell,<sup>1</sup> Robby Büchner,<sup>1,2</sup>  
Sebastian Eckert,<sup>1</sup> Vinícius Vaz da Cruz,<sup>1</sup> and Alexander Föhlisch<sup>1,2</sup>

<sup>1</sup>*Helmholtz-Zentrum Berlin für Materialien und Energie GmbH,  
Institute for Methods and Instrumentation for*

*Synchrotron Radiation Research, 12489 Berlin, Germany.*

<sup>2</sup>*Institute of Physics and Astronomy, University of Potsdam,  
Karl-Liebknecht-Str. 24-25, 14476 Potsdam, Germany*

## COMPUTATION

All spectrum simulations were performed at the TD-DFT level with def2-TZVP basis set and def2/J auxiliary basis set. Three functionals were compared: PBE0[1], M06[2], and B3LYP[3, 4]. The comparison of the spectras for the Cr L-edge is presented in Fig. S1 and for the O K-edge in Fig. S2. Atomic positions in Angstroms used for computation of the x-ray absorption spectra are presented in tables S1-S8.

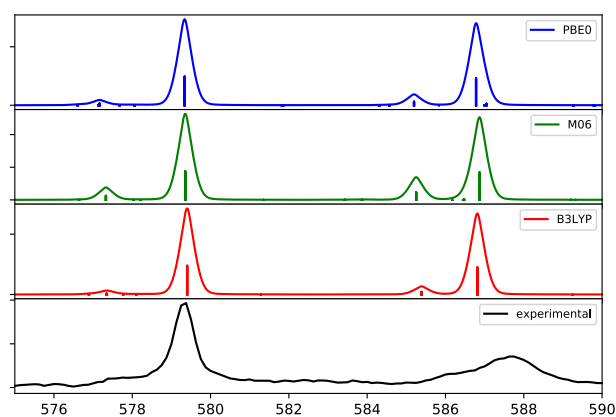

**Figure S1** Comparison of the theoretical Cr L-edge spectra of  $\text{Cr}(\text{CO})_6$  computed with different functionals

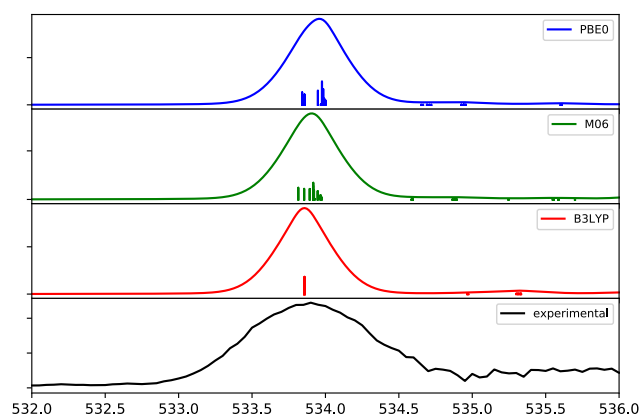

**Figure S2** Comparison of the theoretical O K-edge spectra of  $\text{Cr}(\text{CO})_6$  computed with different functionals

**Table S1** Atomic positions of  $\text{Cr}(\text{CO})_6$  in Angstroms optimized in DFT with B3LYP functional for computation of the O K, and Cr- $L_{3,2}$  edges x-ray absorption computations.

| Atom | x(Å)     | y(Å)     | z(Å)     |
|------|----------|----------|----------|
| Cr   | -0.00001 | -0.00001 | -0.00003 |
| C    | 0.38831  | -0.00194 | 1.88034  |
| C    | -0.38831 | 0.00192  | -1.88039 |
| O    | 0.61593  | -0.00739 | 2.99773  |
| O    | -0.61591 | 0.00737  | -2.99779 |
| C    | -0.91183 | 1.67679  | 0.18752  |
| C    | 0.91181  | -1.67681 | -0.18758 |
| O    | -1.45069 | 2.67575  | 0.29759  |
| O    | 1.45065  | -2.67577 | -0.29764 |
| C    | 1.63887  | 0.93511  | -0.34536 |
| C    | -1.63889 | -0.93512 | 0.34531  |
| O    | 2.61207  | 1.49221  | -0.55251 |
| O    | -2.61209 | -1.49221 | 0.55247  |

## KINETIC MODEL DETAILS

Table S9 shows the fit parameters acquired for the delay traces. In the table, the first three energies displayed correspond to the peaks at the O K-edge.  $a_{sl}$  corresponds to the short lived coefficient acquired in the numerical fit, while  $a_{ll}$  corresponds to the long lived coefficient. The last two wavelengths correspond to the peaks seen in the Cr  $L_3$ -edge transient spectrum. The chromium  $L_3$ -edge delay traces were fitted by a step function where the coefficients considered were presented in the table in the column of the long lived component. Furthermore,  $k$  is the time constant of the decay of the functions at the O K-edge.  $\sigma$  is the width of the Gaussian used for the instrument response convolution and is related to the time resolution of the experiment by the Gaussian function relation  $\text{FWHM} = 2\sqrt{2\ln 2} \sim 2.35482 \cdot \sigma$ .

- 
- [1] C. Adamo and V. Barone, The Journal of Chemical Physics, 1999, **110**, 6158–6170.
  - [2] Y. Zhao and D. G. Truhlar, Theoretical Chemistry Accounts, 2008, **120**, 215–241.
  - [3] A. D. Becke, The Journal of Chemical Physics, 1993, **98**, 5648–5652.
  - [4] C. Lee, W. Yang and R. G. Parr, Physical Review B, 1988, **37**, 785–789.

**Table S2** Atomic positions of Cr(CO)<sub>5</sub>(OHPent) in Angstroms optimized in DFT with B3LYP functional for computation of the O K, and Cr-L<sub>3,2</sub> edges x-ray absorption computations.

| Atom | x(Å)     | y(Å)     | z(Å)     |
|------|----------|----------|----------|
| Cr   | 0.01115  | 0.02549  | -0.17364 |
| O    | 0.78575  | -0.20910 | 1.87629  |
| C    | -0.59400 | 0.29253  | -1.89704 |
| O    | -0.96701 | 0.45698  | -2.97819 |
| C    | -1.10274 | 1.45161  | 0.46093  |
| C    | 1.09541  | -1.42878 | -0.78560 |
| O    | -1.79340 | 2.29747  | 0.80112  |
| O    | 1.71446  | -2.29852 | -1.19840 |
| C    | 1.43016  | 1.26845  | -0.51911 |
| C    | -1.44099 | -1.18872 | 0.09523  |
| O    | 2.24825  | 2.02216  | -0.78720 |
| O    | -2.33674 | -1.89719 | 0.17892  |
| C    | 0.09771  | -1.01999 | 2.86239  |
| C    | 0.77636  | -0.94052 | 4.21362  |
| H    | 0.04746  | -2.05125 | 2.50377  |
| H    | -0.91306 | -0.61719 | 2.90477  |
| C    | 0.04276  | -1.77044 | 5.26674  |
| H    | 0.82328  | 0.10582  | 4.52902  |
| H    | 1.80822  | -1.29684 | 4.11904  |
| C    | 0.70847  | -1.71222 | 6.64024  |
| H    | -0.01241 | -2.81315 | 4.93584  |
| H    | -0.99054 | -1.41672 | 5.35080  |
| C    | -0.03154 | -2.53559 | 7.69173  |
| H    | 0.76796  | -0.66869 | 6.96601  |
| H    | 1.74040  | -2.06772 | 6.55404  |
| H    | -1.05791 | -2.18018 | 7.81522  |
| H    | 0.46242  | -2.47603 | 8.66383  |
| H    | -0.07731 | -3.58893 | 7.40293  |
| H    | 1.71540  | -0.47296 | 1.86511  |

**Table S3** Atomic positions of Cr(CO)<sub>5</sub>(PentOH) bound to C1 in Angstroms optimized in DFT with B3LYP functional for computation of the O K, and Cr-L<sub>3,2</sub> edges x-ray absorption computations.

| Atom | x(Å)     | y(Å)     | z(Å)     |
|------|----------|----------|----------|
| Cr   | -0.29712 | 0.35264  | 0.69301  |
| C    | 0.76374  | 1.94706  | 0.68788  |
| C    | -1.36294 | -1.24362 | 0.66332  |
| C    | -1.86691 | 1.40013  | 1.02347  |
| C    | 1.27612  | -0.68476 | 0.34444  |
| C    | -0.03294 | 0.17315  | 2.51261  |
| O    | 1.40416  | 2.89313  | 0.72346  |
| O    | 0.12873  | 0.06484  | 3.64728  |
| O    | -1.99248 | -2.19655 | 0.68207  |
| O    | 2.22052  | -1.30477 | 0.17380  |
| O    | -2.79503 | 2.02331  | 1.26043  |
| C    | -0.53478 | 0.39540  | -2.16000 |
| H    | -0.75196 | 0.76279  | -1.11374 |
| H    | -0.04899 | -0.57465 | -2.12931 |
| O    | -1.78059 | 0.19532  | -2.79092 |
| H    | -2.24744 | 1.04021  | -2.84250 |
| C    | 0.35771  | 1.44538  | -2.79970 |
| H    | 0.54378  | 1.15073  | -3.83661 |
| H    | 1.31995  | 1.41618  | -2.27982 |
| C    | -0.21547 | 2.85906  | -2.74210 |
| H    | -0.48922 | 3.09659  | -1.70817 |
| H    | -1.13969 | 2.91489  | -3.32718 |
| C    | 0.75908  | 3.91516  | -3.25810 |
| H    | 1.03461  | 3.67654  | -4.29031 |
| H    | 1.68211  | 3.86298  | -2.67178 |
| C    | 0.18725  | 5.32890  | -3.19120 |
| H    | 0.90418  | 6.06612  | -3.55840 |
| H    | -0.07215 | 5.59578  | -2.16343 |
| H    | -0.71971 | 5.41311  | -3.79554 |

**Table S4** Atomic positions of Cr(CO)<sub>5</sub>(PentOH) bound to C2 in Angstroms optimized in DFT with B3LYP functional for computation of the O K, and Cr-L<sub>3,2</sub> edges x-ray absorption computations.

| Atom | x(Å)     | y(Å)     | z(Å)     |
|------|----------|----------|----------|
| Cr   | -0.42939 | 0.91111  | 0.66147  |
| C    | -0.53768 | 2.80713  | 0.39101  |
| C    | -0.34224 | -0.98459 | 0.91917  |
| C    | -2.34175 | 0.83850  | 0.78735  |
| C    | 1.47893  | 0.99423  | 0.55417  |
| C    | -0.31600 | 1.17171  | 2.48346  |
| O    | -0.59728 | 3.94204  | 0.27795  |
| O    | -0.24117 | 1.33983  | 3.62078  |
| O    | -0.29209 | -2.10697 | 1.13008  |
| O    | 2.62103  | 1.05264  | 0.54632  |
| O    | -3.47597 | 0.80153  | 0.91987  |
| C    | -0.78082 | 0.42979  | -2.13073 |
| H    | -1.51214 | -0.29541 | -1.77420 |
| H    | -0.22063 | 0.88323  | -1.27675 |
| C    | -1.48801 | 1.57273  | -2.84604 |
| H    | -0.77375 | 2.36187  | -3.08343 |
| H    | -1.90219 | 1.19620  | -3.78721 |
| O    | -2.51108 | 2.18873  | -2.06421 |
| H    | -3.23110 | 1.55442  | -1.95508 |
| C    | 0.26832  | -0.25822 | -3.00094 |
| H    | 1.01018  | 0.47977  | -3.32192 |
| H    | -0.22648 | -0.62106 | -3.90769 |
| C    | 0.97154  | -1.42417 | -2.31151 |
| H    | 0.22371  | -2.15604 | -1.99173 |
| H    | 1.46169  | -1.06584 | -1.40229 |
| C    | 2.00596  | -2.09950 | -3.20832 |
| H    | 2.77867  | -1.38960 | -3.51401 |
| H    | 1.54015  | -2.49562 | -4.11421 |
| H    | 2.49618  | -2.92755 | -2.69250 |

**Table S5** Atomic positions of  $\text{Cr}(\text{CO})_5(\text{PentOH})$  bound to C3 in Angstroms optimized in DFT with B3LYP functional for computation of the O K, and Cr-L<sub>3,2</sub> edges x-ray absorption computations.

| Atom | x(Å)     | y(Å)     | z(Å)     |
|------|----------|----------|----------|
| Cr   | -0.33385 | 0.80167  | 0.74882  |
| C    | -0.29145 | 2.71035  | 0.58833  |
| C    | -0.38165 | -1.10523 | 0.94626  |
| C    | -2.23380 | 0.84930  | 1.01319  |
| C    | 1.56651  | 0.75563  | 0.51426  |
| C    | -0.08134 | 0.97146  | 2.56802  |
| O    | -0.25058 | 3.85175  | 0.55216  |
| O    | 0.08133  | 1.08153  | 3.70249  |
| O    | -0.41217 | -2.23200 | 1.13235  |
| O    | 2.70648  | 0.74349  | 0.43412  |
| O    | -3.35381 | 0.87302  | 1.23572  |
| C    | -0.85696 | 0.40550  | -2.07748 |
| H    | -1.59929 | -0.30480 | -1.71258 |
| H    | -0.32656 | 0.88143  | -1.21320 |
| C    | 0.20562  | -0.31248 | -2.90658 |
| H    | 1.00540  | 0.38535  | -3.16822 |
| H    | -0.26175 | -0.63285 | -3.84383 |
| C    | -1.54197 | 1.53467  | -2.84670 |
| H    | -1.91019 | 1.10992  | -3.78536 |
| H    | -0.79373 | 2.28478  | -3.11738 |
| C    | -2.69992 | 2.19341  | -2.10625 |
| H    | -2.36355 | 2.69642  | -1.19873 |
| H    | -3.45262 | 1.45512  | -1.82102 |
| H    | -3.18379 | 2.94227  | -2.73598 |
| C    | 0.80425  | -1.53363 | -2.22701 |
| H    | 0.00987  | -2.23183 | -1.94048 |
| H    | 1.33883  | -1.24883 | -1.32134 |
| O    | 1.77449  | -2.19340 | -3.04714 |
| H    | 1.32661  | -2.50731 | -3.84335 |

**Table S6** Atomic positions of Cr(CO)<sub>5</sub>(PentOH) bound to C4 in Angstroms optimized in DFT with B3LYP functional for computation of the O K, and Cr-L<sub>3,2</sub> edges x-ray absorption computations.

| Atom | x(Å)     | y(Å)     | z(Å)     |
|------|----------|----------|----------|
| Cr   | -0.75161 | -0.50819 | -0.60406 |
| C    | 0.72013  | 0.42940  | -1.39813 |
| C    | -2.24167 | -1.43153 | 0.16741  |
| C    | -1.74613 | -0.31109 | -2.22795 |
| C    | 0.21832  | -0.64570 | 1.04482  |
| O    | 1.60813  | 0.95300  | -1.89077 |
| O    | -3.12097 | -2.02104 | 0.59821  |
| O    | -2.33039 | -0.22404 | -3.20610 |
| O    | 0.80973  | -0.75123 | 2.01628  |
| C    | -1.74377 | 2.99924  | -1.01035 |
| H    | -2.02066 | 4.03126  | -0.78458 |
| H    | -2.42647 | 2.62780  | -1.77663 |
| H    | -0.73424 | 3.00308  | -1.42176 |
| C    | -1.83114 | 2.16174  | 0.25444  |
| C    | -3.22990 | 2.08305  | 0.85146  |
| H    | -2.73949 | 1.95497  | 2.94733  |
| O    | -4.64589 | 0.48649  | 3.95440  |
| H    | -5.55244 | 0.30847  | 4.23340  |
| H    | -1.53405 | 1.10917  | 0.03968  |
| H    | -1.10965 | 2.50225  | 0.99894  |
| C    | -3.27400 | 1.36484  | 2.19728  |
| H    | -3.60894 | 3.10329  | 0.96833  |
| H    | -3.89109 | 1.58459  | 0.13571  |
| C    | -4.69366 | 1.12515  | 2.67030  |
| H    | -2.76008 | 0.40228  | 2.12863  |
| H    | -5.22281 | 0.48923  | 1.95152  |
| H    | -5.23394 | 2.07626  | 2.74145  |
| C    | -0.06034 | -2.11761 | -1.18848 |
| O    | 0.36837  | -3.12187 | -1.55392 |



**Table S7** Atomic positions of  $\text{Cr}(\text{CO})_5(\text{PentOH})$  bound to C5 in Angstroms optimized in DFT with B3LYP functional for computation of the O K, and Cr-L<sub>3,2</sub> edges x-ray absorption computations.

| Atom | x(Å)     | y(Å)     | z(Å)     |
|------|----------|----------|----------|
| Cr   | -0.92754 | -0.29363 | -0.23242 |
| C    | 0.18681  | 1.21478  | -0.61080 |
| C    | -2.03621 | -1.80976 | 0.14769  |
| C    | -2.19633 | 0.33692  | -1.52508 |
| C    | 0.33191  | -0.91969 | 1.06686  |
| O    | 0.87483  | 2.08722  | -0.87542 |
| O    | -2.66896 | -2.73844 | 0.34951  |
| O    | -2.93335 | 0.69726  | -2.31886 |
| O    | 1.10242  | -1.32250 | 1.80758  |
| C    | -2.47848 | 1.01921  | 1.63161  |
| H    | -2.59765 | 2.10386  | 1.61868  |
| H    | -3.21491 | 0.60017  | 0.94992  |
| H    | -1.42785 | 0.87393  | 1.28763  |
| C    | -2.62738 | 0.43449  | 3.03043  |
| C    | -4.02367 | 0.67770  | 3.59872  |
| H    | -3.47517 | 0.58750  | 5.68431  |
| O    | -5.67779 | -0.17737 | 6.87461  |
| H    | -6.56747 | -0.01786 | 7.21197  |
| H    | -2.42821 | -0.64043 | 3.00079  |
| H    | -1.87666 | 0.87354  | 3.69368  |
| C    | -4.19990 | 0.12121  | 5.00936  |
| H    | -4.22857 | 1.75383  | 3.60264  |
| H    | -4.76407 | 0.22386  | 2.93086  |
| C    | -5.59706 | 0.35799  | 5.54746  |
| H    | -3.99468 | -0.95412 | 5.01151  |
| H    | -6.33552 | -0.12739 | 4.89841  |
| H    | -5.81633 | 1.43224  | 5.55973  |
| C    | -0.04573 | -1.25080 | -1.53660 |
| O    | 0.51162  | -1.84443 | -2.35020 |

**Table S8** Atomic positions of free CO in Angstroms optimized in DFT with B3LYP functional for computation of the O K-edge x-ray absorption computations.

| Atom | x(Å)     | y(Å)    | z(Å)    |
|------|----------|---------|---------|
| C    | -3.62024 | 0.13173 | 0.00000 |
| O    | -2.49548 | 0.13173 | 0.00000 |

**Table S9** Delay traces fit parameters.  $a_{sl}$  stands for the short lived prefactor.  $a_{ll}$  stands for the long lived prefactor.

| Wavelength | $a_{sl}$           | $a_{ll}$            | k            | $\sigma$   |
|------------|--------------------|---------------------|--------------|------------|
| 532.50     | $6.2e-04 \pm 2e-5$ | $4.71e-04 \pm 1e-5$ |              |            |
| 533.40     | $1.38e-3 \pm 2e-5$ | $6.8e-04 \pm 1e-5$  | $790 \pm 60$ | $20 \pm 2$ |
| 534.30     | $9.0e-04 \pm 2e-5$ | $8.2e-04 \pm 1e-5$  |              |            |
| 578.84     | -                  | $9.9e-04 \pm 1e-5$  | -            |            |
| 579.30     | -                  | $1.329e-3 \pm 1e-5$ | -            | $26 \pm 4$ |
